# Supplementary material
Source: PubMed Central journal article supplement (PMC3090679)
Supplement: NIHMS284436-supplement-1_si_001.pdf [file NIHMS284436-supplement-1_si_001.pdf]

## A nanomolar-potency small molecule inhibitor of Regulator of G protein

### Signaling (RGS) proteins

Levi L Blazer, Haoming Zhang, Emma M Casey, Stephen M Husbands, Richard

R Neubig

#### Supporting Information:

| Compound ID | Structure                                                                           | RGS4 IC <sub>50</sub> (μM) | RGS8 IC <sub>50</sub> (μM) |
|-------------|-------------------------------------------------------------------------------------|----------------------------|----------------------------|
| CCG-50014   | 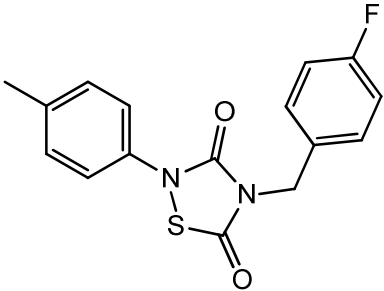  | 0.030                      | 11                         |
| CCG-203778  |  | >100                       | >100                       |

**Table S1.** CCG-50014 and a related analog with limited reactivity. Data are presented as the mean of at least two independent FCPIA experiments.

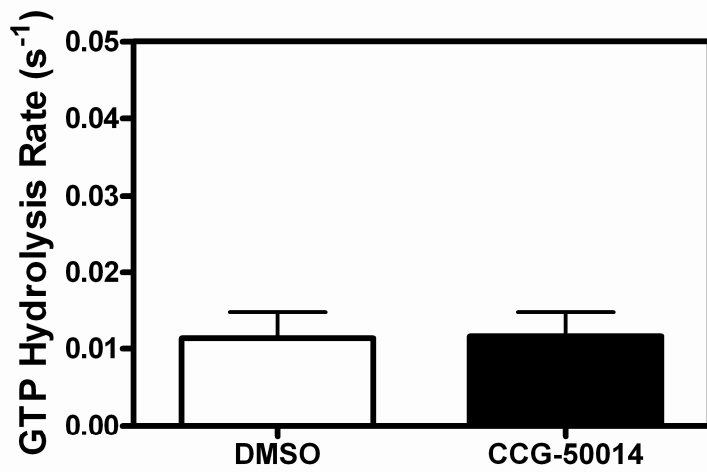

**Figure S1.** CCG-50014 does not affect the intrinsic rate of GTP hydrolysis by  $G\alpha_o$ . The rate of GTP hydrolysis as measured using the single turnover GTPase assay was not significantly different in the absence or presence of 100  $\mu$ M CCG-50014. Data are presented as mean $\pm$ SEM of four independent experiments.
